# Supplementary material for: MicroRNA profiling of plasma exosomes from patients with ovarian cancer using high-throughput sequencing
Source: PubMed Central journal article supplement — Oncol Lett. 2019 Apr 5;17(6):5601–7. doi: 10.3892/ol.2019.10220 (PMC6507395; doi:10.3892/ol.2019.10220), 2019-04-05
Supplement: Supplementary_Data.pdf [file Supplementary_Data.pdf]

Table SI. miScript primers.

| Primer name     | Primer sequence          | Accession no. |
|-----------------|--------------------------|---------------|
| hsa-miR-106a-5p | AAAAGTGCTTACAGTGCAGGTAG  | YP00204563    |
| hsa-let-7d-5p   | AGAGGTAGTAGGTTGCATAGTT   | MS00003136    |
| hsa-miR-93-5p   | CAAAGTGCTGTTTCGTGCAGGTAG | MS00003346    |
| hsa-miR-320a    | AAAAGCTGGGTTGAGAGGGCGA   | MS00014707    |
| hsa-miR-185-5p  | TGGAGAGAAAGGCAGTTCCTGA   | MIMAT0000455  |
| hsa-miR-99b-5p  | CAAGCTCGTGTCTGTGGGTCCG   | MS00032172    |
| hsa-miR-122-5p  | TGGAGTGTGACAATGGTGTTTG   | MS00003416    |
| hsa-miR-92a-3p  | TATTGCACTTGTCCCGGCCTGT   | MIMAT0000092  |

miR, microRNA.

Table SII. Characteristics of patients with ovarian cancer.

| Clinicopathological characteristic  | Ovarian cancer, n | Healthy women, n |
|-------------------------------------|-------------------|------------------|
| Age, years                          | $\chi^2=0.532$    | P=0.596          |
| ≤50                                 | 18                | 17               |
| >50                                 | 12                | 13               |
| Tumor stage                         |                   |                  |
| T1/T2                               | 13                | -                |
| T3/T4                               | 17                | -                |
| TNM stage                           |                   |                  |
| I                                   | 2                 | -                |
| II                                  | 4                 | -                |
| III-IV                              | 24                | -                |
| Treatment                           |                   |                  |
| Surgical treatment                  | 12                | -                |
| Non-surgical treatment <sup>a</sup> | 18                | -                |

TNM, Tumour-Node-Metastasis. <sup>a</sup>All patients have not received any form of surgery or other treatments.

Table SIII. Summary of the upregulated miRNAs in patients with ovarian cancer compared with healthy women.

| miRNA name       | Fold-change | P-value                 |
|------------------|-------------|-------------------------|
| hsa-miR-106a-5p  | 6.7766      | 0                       |
| hsa-miR-584-3p   | 2.4604      | 0                       |
| hsa-miR-93-5p    | 2.2672      | 0                       |
| hsa-miR-4659a-3p | 2.1980      | 0                       |
| hsa-miR-345-5p   | 1.6382      | 0                       |
| hsa-miR-103a-3p  | 1.2297      | 0                       |
| hsa-let-7d-5p    | 1.1941      | 0                       |
| hsa-miR-378a-3p  | 1.1143      | 0                       |
| hsa-miR-320a     | 1.0599      | 0                       |
| hsa-miR-425-3p   | 1.0565      | 0                       |
| hsa-miR-196b-5p  | 1.0398      | 0                       |
| hsa-miR-20b-5p   | 1.3394      | $2.51 \times 10^{-275}$ |
| hsa-miR-942-5p   | 1.6697      | $9.91 \times 10^{-260}$ |
| hsa-miR-374b-5p  | 1.5139      | $2.52 \times 10^{-154}$ |
| hsa-miR-1246     | 2.0259      | $3.85 \times 10^{-105}$ |
| hsa-miR-624-5p   | 1.1539      | $4.23 \times 10^{-105}$ |
| hsa-miR-30b-5p   | 1.1470      | $1.34 \times 10^{-88}$  |
| hsa-miR-4659b-3p | 1.3527      | $3.71 \times 10^{-54}$  |
| hsa-miR-339-3p   | 1.3117      | $3.08 \times 10^{-48}$  |
| hsa-miR-579-5p   | 1.8093      | $1.58 \times 10^{-27}$  |
| hsa-miR-505-5p   | 1.6602      | $4.11 \times 10^{-29}$  |
| hsa-miR-330-5p   | 1.3375      | $3.05 \times 10^{-21}$  |
| hsa-miR-3944-5p  | 1.5382      | $3.57 \times 10^{-21}$  |
| hsa-miR-532-3p   | 1.2697      | $3.89 \times 10^{-20}$  |
| hsa-miR-99b-3p   | 1.9288      | $7.37 \times 10^{-12}$  |
| hsa-miR-3913-5p  | 1.9061      | $3.58 \times 10^{-11}$  |
| hsa-miR-6513-5p  | 1.0670      | $3.63 \times 10^{-11}$  |
| hsa-miR-374a-3p  | 1.2292      | $1.82 \times 10^{-10}$  |
| hsa-miR-1307-5p  | 1.5932      | $4.03 \times 10^{-8}$   |
| hsa-miR-154-5p   | 1.0151      | $6.23 \times 10^{-8}$   |
| hsa-miR-7850-5p  | 1.0589      | $2.56 \times 10^{-7}$   |
| hsa-miR-378a-5p  | 1.1177      | $3.46 \times 10^{-6}$   |
| hsa-miR-320c     | 1.2031      | 0.0001270               |
| hsa-miR-320d     | 1.7760      | 0.0002510               |

miRNA/miR, microRNA.

Table SIV. Summary of the downregulated miRNAs in patients with ovarian cancer compared with healthy women.

| miRNA name       | Fold-change | P-value     |
|------------------|-------------|-------------|
| hsa-miR-4732-3p  | -2.70018    | 0           |
| hsa-miR-128-3p   | -2.49206    | 0           |
| hsa-miR-423-5p   | -1.74454    | 0           |
| hsa-miR-139-5p   | -2.48727    | 0           |
| hsa-miR-342-3p   | -2.32591    | 0           |
| hsa-miR-99a-5p   | -1.49118    | 0           |
| hsa-let-7d-3p    | -2.23454    | 0           |
| hsa-miR-150-5p   | -2.05132    | 0           |
| hsa-miR-92a-3p   | -1.82245    | 0           |
| hsa-miR-744-5p   | -1.80408    | 2.5109E-275 |
| hsa-miR-92b-3p   | -1.74766    | 9.9114E-260 |
| hsa-miR-122-5p   | -2.48727    | 2.5164E-154 |
| hsa-miR-99b-5p   | -1.71621    | 3.8493E-105 |
| hsa-miR-185-5p   | -1.69877    | 4.2341E-105 |
| hsa-miR-5010-5p  | -1.56332    | 1.33894E-88 |
| hsa-miR-323b-3p  | -2.31042    | 3.70692E-54 |
| hsa-miR-323a-5p  | -1.38074    | 3.07954E-48 |
| hsa-miR-139-3p   | -1.28869    | 1.57753E-27 |
| hsa-miR-204-5p   | -1.28075    | 4.53442E-22 |
| hsa-miR-509-3p   | -1.15178    | 5.0447E-022 |
| hsa-miR-4446-3p  | -1.12531    | 3.04804E-21 |
| hsa-miR-30a-5p   | -1.11314    | 3.56974E-20 |
| hsa-miR-4433b-3p | -3.97142    | 7.37085E-12 |
| hsa-miR-4467     | -3.95111    | 3.57668E-11 |
| hsa-miR-95-3p    | -3.06686    | 3.62744E-11 |
| hsa-miR-224-5p   | -3.05326    | 1.82144E-10 |
| hsa-miR-497-5p   | -2.92548    | 4.03498E-08 |
| hsa-miR-328-3p   | -2.89608    | 6.23481E-08 |
| hsa-miR-409-3p   | -2.89575    | 2.55639E-07 |
| hsa-let-7e-3p    | -2.86462    | 3.45669E-06 |
| hsa-miR-125a-5p  | -2.83454    | 0.000127243 |

miRNA/mir, microRNA.
